# Supplementary material for: Identification of Interphase Functions for the NIMA Kinase Involving Microtubules and the ESCRT Pathway
Source: PubMed Central journal article supplement (PMC3967960; doi:10.1371/journal.pgen.1004248), 2014-03-27

Figure S1

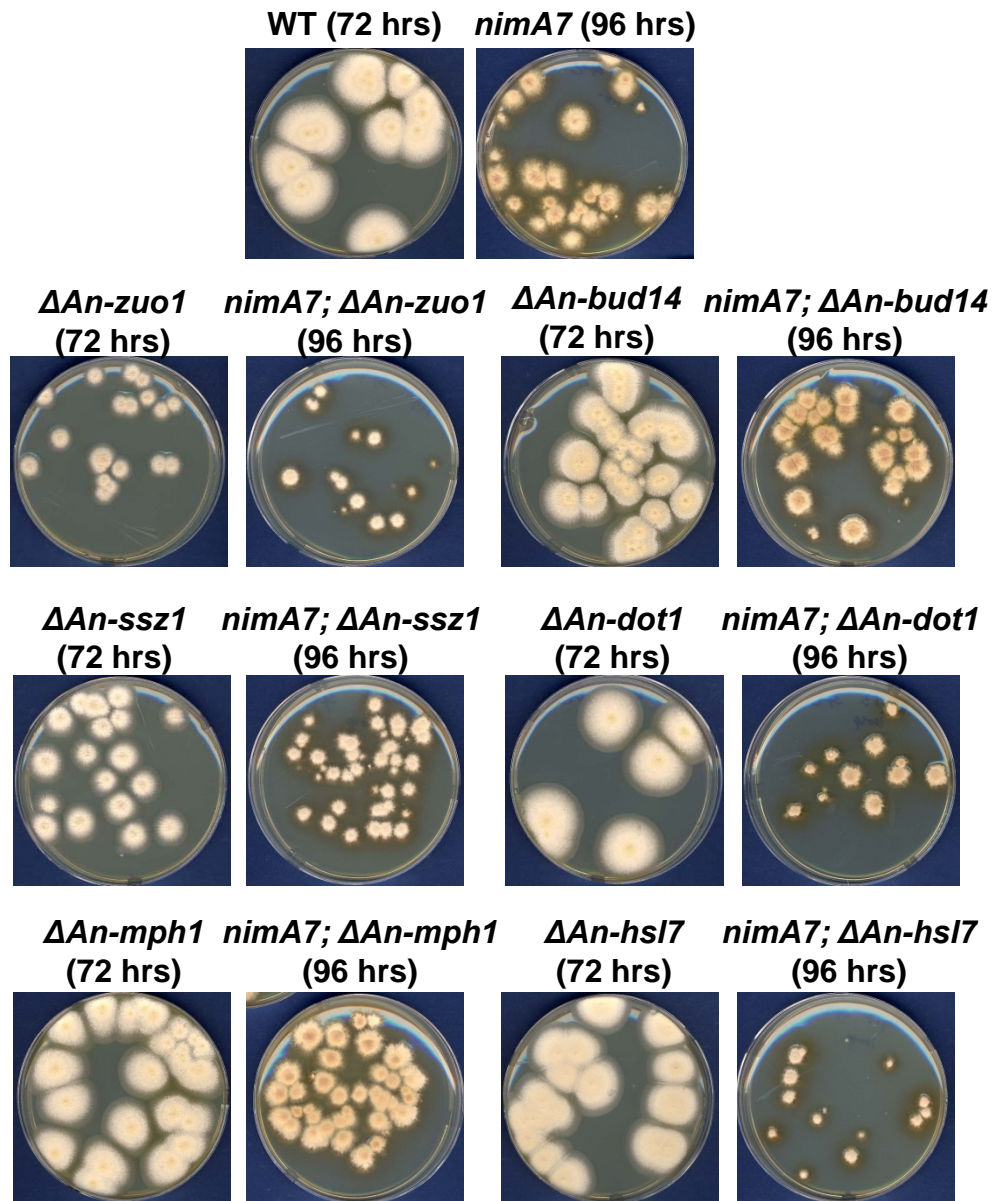

Supplement: pgen.1004248.s001.pdf [file pgen.1004248.s001.pdf]
