# Supplementary material for: Identification of Interphase Functions for the NIMA Kinase Involving Microtubules and the ESCRT Pathway
Source: PubMed Central journal article supplement (PMC3967960; doi:10.1371/journal.pgen.1004248), 2014-03-27
Supplement: pgen.1004248.s012.pdf [file pgen.1004248.s012.pdf]

**Table S1: List of strains used in the study**

| <b>Name</b> | <b>Genotype</b> (all strains also carry <i>veA1</i> )                                                                                                                                                                     |
|-------------|---------------------------------------------------------------------------------------------------------------------------------------------------------------------------------------------------------------------------|
| KF45        | <i>nimA-GFP::pyrG<sup>AF</sup></i> ; <i>NDC80-CR::pyroA<sup>AF</sup></i> ; <i>argB2</i> ; <i>nirA14?</i> ; <i>sE15?</i> ; <i>wA3</i>                                                                                      |
| CDS683      | <i>alcA::NIMA-GFP::pyr4<sup>+</sup></i> ( <i>pyrG89</i> ); <i>Nup49-CR::pyroA<sup>AF</sup></i> ; <i>chaA1</i> ( <i>pyroA4?</i> <i>nirA14?</i> )                                                                           |
| CDS1068     | <i>GFP-S-tag::pyrG<sup>AF</sup></i> ( <i>pyrG89</i> ); $\Delta$ <i>nKuA<sup>Ku70</sup></i> :: <i>argB</i> ( <i>argB2</i> ); <i>pyroA4</i> ; <i>nirA14</i> ; <i>sE15</i> , <i>wA3</i> ; <i>fwA1</i> ; <i>chaA1</i>         |
| CDS131      | <i>alcA::<sup>HA-285</sup><math>\Delta</math>NnimA-GFP::pyr4</i> ( <i>pyrG89</i> ); <i>pyr4<sup>+</sup></i> ; <i>pyroA4</i> ; <i>wA</i>                                                                                   |
| R153        | <i>pyroA4</i> ; <i>wA3</i>                                                                                                                                                                                                |
| MG385       | <i>alcA::NIMA-GFP::pyr4<sup>+</sup></i> ( <i>pyrG89</i> ); <i>EB1-CR::pyro<sup>AF</sup></i> ( <i>pyroA4?</i> ); $\Delta$ <i>nKuA<sup>Ku70</sup></i> :: <i>argB/argB<sup>+</sup>?</i> , <i>wA3</i>                         |
| MG409       | <i>alcA::NIMA-GFP::pyr4<sup>+</sup></i> ( <i>pyrG89</i> ); <i>argB2</i> ; <i>sE15</i> ; <i>wA3</i>                                                                                                                        |
| MG410       | <i>alcA::NIMA-GFP::pyr4<sup>+</sup></i> ; <i>pyrG89</i> ; $\Delta$ <i>An-EB1::pyrG<sup>AF</sup></i> ( <i>pyrG89</i> ); <i>argB2</i> ; <i>sE15</i> ; <i>wA3</i>                                                            |
| MG395       | <i>GFP-tubA</i> ; <i>EB1-CR::pyro<sup>AF</sup></i> ( <i>pyroA4</i> ); <i>argB2</i> ; <i>sE15</i> ; <i>nirA14?</i>                                                                                                         |
| MG397       | <i>nimA7</i> ; <i>GFP-tubA</i> ; <i>EB1-CR::pyro<sup>AF</sup></i> ( <i>pyroA4</i> ); <i>argB2</i> ; <i>sE15</i> ; <i>nirA14?</i>                                                                                          |
| MG44        | <i>nimA7</i> ; $\Delta$ <i>nKuA<sup>Ku70</sup></i> :: <i>argB</i> ( <i>argB2</i> ); <i>riboA1</i> ; <i>pyroA4</i> ; <i>pyrG89</i> ; <i>nicB8/A2?</i> ; <i>wA3</i>                                                         |
| MG8         | $\Delta$ <i>An-zuo1::pyrG<sup>AF</sup></i> ( <i>pyrG89</i> ); $\Delta$ <i>nKuA<sup>Ku70</sup></i> :: <i>argB</i> ( <i>argB2</i> ); <i>pyroA4</i> ; <i>nirA14</i> ; <i>sE15</i> , <i>wA3</i> ; <i>fwA1</i> ; <i>chaA1</i>  |
| MG61        | <i>nimA7</i> ; $\Delta$ <i>An-zuo1::pyrG<sup>AF</sup></i> ( <i>pyrG89</i> ); $\Delta$ <i>nKuA<sup>Ku70</sup></i> :: <i>argB</i> ( <i>argB2</i> ); <i>riboA1</i> ; <i>pyroA4</i> ; <i>nicB8/A2?</i> ; <i>wA3</i>           |
| MG19        | $\Delta$ <i>An-bud14::pyrG<sup>AF</sup></i> ( <i>pyrG89</i> ); $\Delta$ <i>nKuA<sup>Ku70</sup></i> :: <i>argB</i> ( <i>argB2</i> ); <i>pyroA4</i> ; <i>nirA14</i> ; <i>sE15</i> , <i>wA3</i> ; <i>fwA1</i> ; <i>chaA1</i> |
| MG67        | <i>nimA7</i> ; $\Delta$ <i>An-bud14::pyrG<sup>AF</sup></i> ( <i>pyrG89</i> ); $\Delta$ <i>nKuA<sup>Ku70</sup></i> :: <i>argB</i> ( <i>argB2</i> ); <i>riboA1</i> ; <i>pyroA4</i> ; <i>nicB8/A2?</i> ; <i>wA3</i>          |
| MG10        | $\Delta$ <i>An-ssz1::pyrG<sup>AF</sup></i> ( <i>pyrG89</i> ); $\Delta$ <i>nKuA<sup>Ku70</sup></i> :: <i>argB</i> ( <i>argB2</i> ); <i>pyroA4</i> ; <i>nirA14</i> ; <i>sE15</i> , <i>wA3</i> ; <i>fwA1</i> ; <i>chaA1</i>  |
| MG62        | <i>nimA7</i> ; $\Delta$ <i>An-ssz1::pyrG<sup>AF</sup></i> ( <i>pyrG89</i> ); $\Delta$ <i>nKuA<sup>Ku70</sup></i> :: <i>argB</i> ( <i>argB2</i> ); <i>riboA1</i> ; <i>pyroA4</i> ; <i>nicB8/A2?</i> ; <i>wA3</i>           |
| MG12        | $\Delta$ <i>An-dot1::pyrG<sup>AF</sup></i> ( <i>pyrG89</i> ); $\Delta$ <i>nKuA<sup>Ku70</sup></i> :: <i>argB</i> ( <i>argB2</i> ); <i>pyroA4</i> ; <i>nirA14</i> ;                                                        |

|       |                                                                                                                                                                           |
|-------|---------------------------------------------------------------------------------------------------------------------------------------------------------------------------|
|       | <i>sE15, wA3; fwA1; chaA1</i>                                                                                                                                             |
| MG63  | <i>nimA7; ΔAn-dot1::pyrG<sup>AF</sup> (pyrG89); ΔnKuA<sup>Ku70</sup>::argB (argB2); riboA1; pyroA4; nicB8/A2?; wA3</i>                                                    |
| MG22  | <i>ΔAn-mph1::pyrG<sup>AF</sup> (pyrG89); ΔnKuA<sup>Ku70</sup>::argB(argB2); pyroA4; nirA14; sE15, wA3; fwA1; chaA1</i>                                                    |
| MG68  | <i>nimA7; ΔAn-mph1::pyrG<sup>AF</sup> (pyrG89); ΔnKuA<sup>Ku70</sup>::argB (argB2); riboA1; pyroA4; nicB8/A2?; wA3</i>                                                    |
| MG14  | <i>ΔAn-hsl7::pyrG<sup>AF</sup> (pyrG89); ΔnKuA<sup>Ku70</sup>::argB(argB2); pyroA4; nirA14; sE15, wA3; fwA1; chaA1</i>                                                    |
| MG64  | <i>nimA7; ΔAn-hsl7::pyrG<sup>AF</sup> (pyrG89); ΔnKuA<sup>Ku70</sup>::argB (argB2); riboA1; pyroA4; nicB8/A2?; wA3</i>                                                    |
| SO451 | <i>pyrG89; ΔnKuA<sup>Ku70</sup>::argB(argB2); pyroA4; nirA14; sE15, wA3; fwA1; chaA1</i>                                                                                  |
| MGH21 | Heterokaryon carrying both WT <i>An-vps23</i> and <i>ΔAn-vps23::pyrG<sup>AF</sup> (pyrG89); ΔnKuA<sup>Ku70</sup>::argB(argB2); pyroA4; nirA14; sE15, wA3; fwA1; chaA1</i> |
| MGH26 | Heterokaryon carrying both WT <i>An-vps25</i> and <i>ΔAn-vps25::pyrG<sup>AF</sup> (pyrG89); ΔnKuA<sup>Ku70</sup>::argB(argB2); pyroA4; nirA14; sE15, wA3; fwA1; chaA1</i> |
| MGH19 | Heterokaryon carrying both WT <i>An-vps23</i> and <i>ΔAn-vps23::pyrG<sup>AF</sup> (pyrG89); nimA7; ΔnKuA<sup>Ku70</sup>::argB (argB2); riboA1; pyroA4; nicB8/A2?; wA3</i> |
| MGH14 | Heterokaryon carrying both WT <i>An-vps25</i> and <i>ΔAn-vps25::pyrG<sup>AF</sup> (pyrG89); nimA7; ΔnKuA<sup>Ku70</sup>::argB (argB2); riboA1; pyroA4; nicB8/A2?; wA3</i> |
| MGH17 | Heterokaryon carrying both WT <i>An-vps23</i> and <i>ΔAn-vps23::pyrG<sup>AF</sup> (pyrG89); nimA7; ΔnKuA<sup>Ku70</sup>::argB (argB2); riboA1; pyroA4; nicB8/A2?; wA3</i> |
| MG71  | <i>nimA7; pyrG<sup>AF</sup> insertion (pyrG89); ΔnKuA<sup>Ku70</sup>::argB (argB2); riboA1; pyroA4; nicB8/A2?; wA3</i>                                                    |
| MGH53 | Heterokaryon carrying both WT <i>An-vps28</i> and <i>ΔAn-vps28::pyrG<sup>AF</sup> (pyrG89); ΔnKuA<sup>Ku70</sup>::argB(argB2); pyroA4; nirA14; sE15, wA3; fwA1; chaA1</i> |
| MGH55 | Heterokaryon carrying both WT <i>An-vps28</i> and <i>ΔAn-vps28::pyrG<sup>AF</sup> (pyrG89); nimA7; ΔnKuA<sup>Ku70</sup>::argB (argB2); riboA1; pyroA4; nicB8/A2?;</i>     |

|       |                                                                                                                                                                                                                     |
|-------|---------------------------------------------------------------------------------------------------------------------------------------------------------------------------------------------------------------------|
|       | wA3                                                                                                                                                                                                                 |
| MGH49 | Heterokaryon carrying both WT <i>An-vps24</i> and $\Delta An-vps24::pyrG^{AF}$ ( <i>pyrG89</i> ); $\Delta nKuA^{Ku70}::argB(argB2)$ ; <i>pyroA4</i> ; <i>nirA14</i> ; <i>sE15</i> , wA3; <i>fwA1</i> ; <i>chaA1</i> |
| MGH51 | Heterokaryon carrying both WT <i>An-vps24</i> and $\Delta An-vps24::pyrG^{AF}$ ( <i>pyrG89</i> ); <i>nimA7</i> ; $\Delta nKuA^{Ku70}::argB(argB2)$ ; <i>riboA1</i> ; <i>pyroA4</i> ; <i>nicB8/A2?</i> ; wA3         |
| MGH57 | Heterokaryon carrying both WT <i>An-vps36</i> and $\Delta An-vps36::pyrG^{AF}$ ( <i>pyrG89</i> ); $\Delta nKuA^{Ku70}::argB(argB2)$ ; <i>pyroA4</i> ; <i>nirA14</i> ; <i>sE15</i> , wA3; <i>fwA1</i> ; <i>chaA1</i> |
| MGH59 | Heterokaryon carrying both WT <i>An-vps36</i> and $\Delta An-vps36::pyrG^{AF}$ ( <i>pyrG89</i> ); <i>nimA7</i> ; $\Delta nKuA^{Ku70}::argB(argB2)$ ; <i>riboA1</i> ; <i>pyroA4</i> ; <i>nicB8/A2?</i> ; wA3         |
| MGH45 | Heterokaryon carrying both WT <i>An-vps4</i> and $\Delta An-vps4::pyrG^{AF}$ ( <i>pyrG89</i> ); $\Delta nKuA^{Ku70}::argB(argB2)$ ; <i>pyroA4</i> ; <i>nirA14</i> ; <i>sE15</i> , wA3; <i>fwA1</i> ; <i>chaA1</i>   |
| MGH47 | Heterokaryon carrying both WT <i>An-vps4</i> and $\Delta An-vps4::pyrG^{AF}$ ( <i>pyrG89</i> ); <i>nimA7</i> ; $\Delta nKuA^{Ku70}::argB(argB2)$ ; <i>riboA1</i> ; <i>pyroA4</i> ; <i>nicB8/A2?</i> ; wA3           |

? Indicates marker might be present but covered by another mutation or the allele present not known.
